# Supplementary material for: Polysaccharides from Ganoderma lucidum attenuate microglia-mediated neuroinflammation and modulate microglial phagocytosis and behavioural response
Source: PubMed Central journal article supplement (PMC5364682; doi:10.1186/s12974-017-0839-0), 2017-03-24
Supplement: 12974_2017_839_MOESM1_ESM.pdf [file 12974_2017_839_MOESM1_ESM.pdf]

## Supplement Figure 1

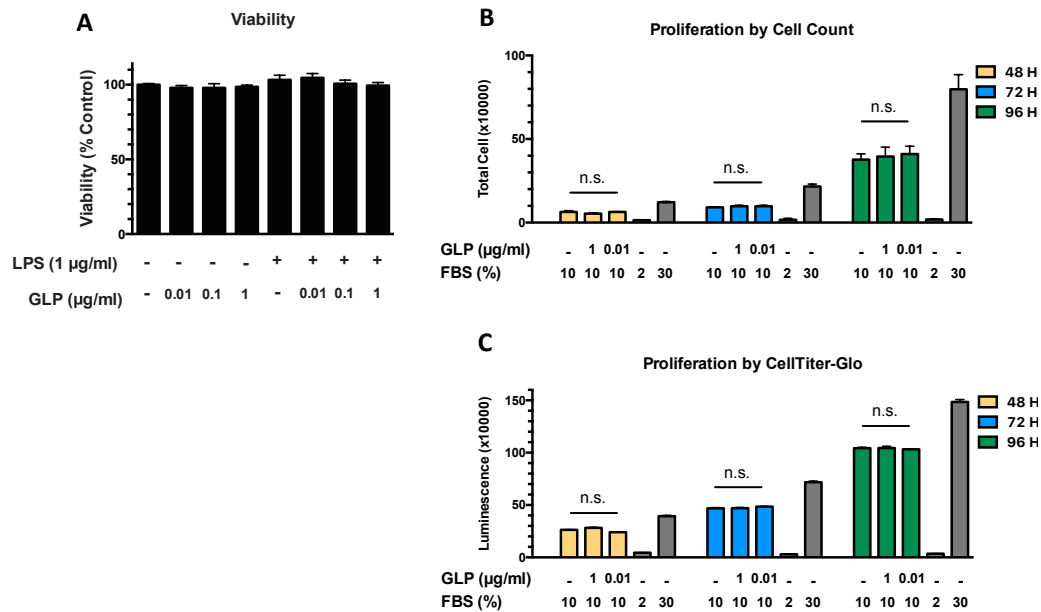

**Fig. 1 GLP exhibited no cytotoxicity and proliferative effect to BV2 cells.**

(A) GLP effect on BV2 cell viability was examined for 24 hours in the presence and absence of LPS stimulation. No cytotoxicity was detected. GLP long-term effect on cell growth was investigated for 48, 72 and 96 hours. Cell growth was estimated by total cell count (B) and CellTiter-Glo assay (C). Cells were incubated in normal DMEM culture medium with 10% FBS supplement. Both 1  $\mu\text{g/ml}$  and 0.01  $\mu\text{g/ml}$  showed no effect on cell growth compared to untreated control. Cells grown in FBS depleted medium (2% FBS) showed little cell growth, whereas in the FBS enriched medium (30% FBS) the cell growth exceeds normal cultured medium.

## Supplement Figure 2

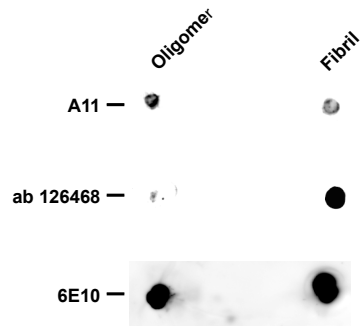

**Fig. 2 Confirmation on the integrity of prepared A $\beta$  oligomer**

Four microliters of oligomers or fibril were loaded to the nitrocellulous membrane. Dot blot was performed and the oligomer- (A11) and Fibril-specific (ab126468) antibodies were used. In the prepared oligomer (left lane), little fibril fractions were detected, whilst in the prepared A $\beta$  fibril (right lane), certain levels of oligomers were also detected. Staining of 6E10 revealed the total A $\beta$  content.
